# Supplementary material
Source: ML conference proceedings conference paper supplement (https://aclanthology.org/2022.findings-aacl.3)
Supplement: Dataset [file Creole MT evaluation Annotations.xlsx]

## Sheet: cr-en
Sentence ID	Input	Reference	Translation	Adequacy (1-5)	Fluency (1-5)	Translation better than reference (0/1)
1	Seki kontan so papa oubien so mama plis ki mwa, li pa dign pou vinn mo disip.	If you love your father or mother or even your sons and daughters more than me, you are not fit to be my disciples.	If you love your father or mother more than me, you don’t have to be my disciple.	4	5	1
2	Li pou met bann mouton dan so kote drwat e bann kabri dan so gos.	He will place the sheep on his right and the goats on his left.	He will put the sheep on his right side and the goats on his left side.	5	5	0
3	Letan li ti pe pase, li trouv Levi, garson Alfe.	As he walked along, he saw Levi, the son of Alphaeus.	As he was walking, he saw Levi, the son of the Cowshed.	3	5	0
4	Apre 32 depozision lapolis, enn lagrev lafin, bann lartik dan lapres, bann menas pouswit e deportasion, zafer, avek zimaz komba po later kont po feray, finn terminn kont enn dilo boudin.	After 32 statements to the police, a hunger strike, newspaper articles, threats of prosecution and deportation, the case, like the battle of earthen pot against the iron pot, ended in water coil.	After 32 depositions of the police, a strike of the late, articles in the press, assaults on the prompt and prompt deportation, and things with the stupid stupidity of the fight against the iron against the iron bark, have been put to an end with boiling water.	2	5	0
5	Patron la dir aster mo pou repran sa talan la e mo pou donn li sa dimoun ki ena dis la.	Then the master said, now your money will be taken away and given to the servant with ten thousand coins.	The boss says now I will pick up the talent and give him the one who has ten.	5	5	1
6	Akoz samem enn zom pou kit so papa ek so mama pou li marie.	That's why a man leaves his father and mother and gets married.	That is why a man will leave his father and mother to marry.	5	5	0
7	Akoz samem si to vinn devan lotel pou ofer enn sakrifis e to rapel ki to pa bien ar to frer, les to ofrand lamem, rekonsilie ar to frer, apre to va prezant to ofrand Bondie.	This is why if you are about to place your gift on the altar and remember that you do not get along well with your brother leave your gift here, make peace with your brother, then come back and offer your gift to God.	This is why, if you come to the hotel to offer a sacrifice, and remember that you are not good to your brother, let your offer be made up for yourself, and be reconciled to your brother, then you will make your offering to God.	5	5	1
8	Li dir zot, mo ranpli ar enn gran tristes koumadir mo pe mor.	He said to them, I am so sad that I feel as if I am dying.	He said to them, I am full of such sadness that I am dying.	5	5	0
9	Enn gran lafoul ti pe swiv li e li ti pe geri zot tou.	Large crowds followed him, and he healed their sick people.	A large crowd was following him and healing them all.	3	4	0
10	Lespri ti ris Zezi dan dezer kot diab ti tant li.	Jesus and the devil	The spirit caused Jesus to go into the desert, where the deer had tasted him.	2	5	1
11	Enn zour enn dimoun ti gagn lide met anvant bann obze ki bar plas dan lakaz.	One day, someone got the idea to sell large household items.	One day, someone got the idea of inventing objects to bark the house.	1	1	0
12	Parski li pa proteze par enn latmosfer kouma later, lalinn pa proteze kont sa bann evennman la – so sirfas ranpli avek krater temwagne.	Because it is not protected by an atmosphere as is the Earth, the Moon is not immune to such events - its reflected surface studded with craters.	Because it is not protected by an earthy atmosphere, the lune is not protected against these events – its surface is full of witnesses.	3	3	0
13	Bann bon menwizie ek sarpantie ti pe kapav debrouye san tro difikilte.	The joiners and carpenters fended for themselves without too much trouble.	The good men and the carpenters could all get ahead without much difficulty.	3	5	1
14	E mo pa ase bon, pou mo kourbe devan li, pou larg so sandalet.	And I am not good enough even to stoop down and untie his sandals.	And I'm not good enough, I'll bend in front of him, and let him loose his sandals.	4	5	0
15	Li ferm labous bann demon parski zot ti kone ki Zezi ete.	But the demons knew who he was, and he did not let them speak.	He silenced the demons because they knew who Jesus was.	5	5	1
16	Relasion ant Dr D.Y. Patil Medical College, reprezante par konpagni D.Y.P. Worldwide Ltd e UTM, ti ofisialize le 25 zwin 2009 par protokol lakor la.	The relationship between Dr. D.Y. Patil Medical College, represented by the company DYP Worldwide Ltd and UTM, was formalized in June 25, 2009 by the MoU.	The relationship between Dr.Y. Patil Medical College, represented by the D.Y.P. Worldwide and U kind, was officialized at the 25 o’clock through the protocol of the agreement.	4	4	0
17	Li dir li, profeser, ki pli gran komannman dan lalwa?	He asked him, teacher, what is the most important commandment in the Law?	He said, teacher, what are the most important commandments in the law?	5	5	1
18	Zot ti pe evolie natirelman dan enn lanvironnman pourtan pa fasil.	They were evolving naturally in a frankly difficult environment.	They were naturally educated in an unfaithful environment for a long time.	3	5	0
19	Personn pa pran enn bout latwal ki pankor retresi pou rakomod enn vie linz.	No one patches old clothes by sewing on a piece of new cloth.	No one takes a piece of tissue which is still rinked to make up an old clothes.	3	5	0
20	Zot pou fer lepep krwar, li finn resisite parmi bann mor, e sa mansonz la pou pli pir ki premie la.	They will tell the people that he has been raised to life, and this last lie will be worse than the first one.	People will believe that he did die, and that man will be worse than the first one.	3	5	0
21	“Kimanyer mo pu al rode ki kote pwason ete?”, Zoko kalkile.	”How can I find out where all the fish have gone?”, Zoko thinks about it.	“How will I go and look for the side of the fish?”, Zoko kalkiles.	4	4	0
22	Kan bann fidoner leve e koumans prepar zot lalanp, bann insousian la dimann bann seki bien saz la, er nou gagn inpe delwil ar zot.	When the girls got up and started getting their lamps ready, the foolish ones said to the others, let us have some of your oil.	When the diviners got up and started preparing their lamps, the unwise ones asked the well-dressed ones, we’ll have some oil with them.	3	4	0
23	Partu kote dan Moris, bann papa ek bann mama travay dir tut long lane.	All over Mauritius, fathers and mothers work hard during the year.	Everywhere in Mauritius, fathers and mothers work very hard all the year round.	5	5	1
24	Sa pwason 9 pie la, ki finn maye dan dilo Koleford la mwa dernie.	The 9-foot fish, caught in waters off Kjollefjord last month.	The nine-foot fish caught in the Kolea water is my last.	3	5	0
25	Ti ena enn troupo koson ki ti pe manze dan lezanviron.	Not far from there a large herd of pigs was feeding.	There was a troupeau of pigs that was still a game in the outside world.	2	2	0
26	Depi sa zur la tipul vinn kamarad ek Bonom Lapay.	From that day onwards the little hen becomes the Scarecrow’s friend.	Ever since that day, the little mouse becomes friends with Old Man Lapay.	3	5	0
27	Apre, diab ti amenn Zezi lavil sint e fer li dibout net lao lor tanp.	People need every word that God has spoken.	Then the dust brought Jesus to the town and made him straight up on the temple.	4	5	1
28	Me kan li al pre ar li, li pa trouv okenn fri, me zis bann fey.	But when he came to it, he found only leaves and no figs.	But when he goes near him, he can’t find any fruits, but only leaves.	5	5	1
29	Pilat dimann zot, ki mo pou fer ar Zezi ki zot apel Lekris?	Pilate asked them, what am I to do with Jesus, who is called the Messiah?	Pilate asked them what I would do with Jesus, whom they called Jesus Christ?	5	5	1
30	Detrwa ki ti la tann sa e zot dir, li pe apel Eli.	Some of the people standing there heard Jesus and said, he's calling for Elijah.	Some of them heard this and said, his name is Elijah.	5	5	1
31	Mo papa ki ti pe pran plis responsabilite amizir mo granper ti pe vieyi, ti fer tou pou aste teren Bay Goulam me nou vwazen ti refiz vande parski, li ti pe dir ouvertman, li ti santi li ek so fami ansekirite dan Kan Ramsamy.	My father, who took on more and more responsibilities as my grandfather got older, did everything in his power to buy Bhai Goolam’s land but our neighbour refused to sell because, and he would say this openly, he and his family felt safe in Camp Ramsamy.	My dad, who was taking even more responsibility for making my grandfather grow old, did all to buy the land of Bhai Goulam but our neighbours refused to sell it because, he said openly, he felt him and his family were safe in Camp Ramsamy.	4	5	0
32	Mo anset ti vinn dan vilaz lepok ki tabisman ti bizen travayer dan plantasion.	My ancestors came to the village back when the estates needed workers for the plantation.	My ancestors came into the village at a time when there was no need for workers to plant.	4	5	0
33	Mo finn fini prepare mo bann toro ek mo bann zanimo bien gra.	My cattle and prize calves have all been prepared.	I have prepared my mice and my animals very fat.	2	3	0
34	Enn gran lafoul antour li, li ti pe ansegn zot.	A large crowd gathered around him, and he taught them.	A large crowd crowd crowd surrounded him and taught them.	3	1	0
35	Enn mwa plitar, Bondie avoy anz Gabriel dan lavil Nazaret dan Galile, avek enn mesaz pou enn vierz ki apel Mari.	One month later God sent the angel Gabriel to the town of Nazareth in Galilee with a message for a virgin named Mary.	One month later, God sent Angel Gabriel to the town of Nazareth in Galilee with a message for a man named Mary.	3	5	0
36	Ala, mo dir zot, pou ras Rwayom Bondie ar zot e pou donn sa enn pep ki pou prodwir vre fri.	I tell you that God's kingdom will be taken from you and given to people who will do what he demands.	This is my message to you, that you will take the kingdom of heaven from you and give it to the people who will produce real fruits.	5	5	1
37	Li ti anvlop li dan lanz e plas li dan enn manzwar, parski pa ti ena plas pou zot dan lasal pou vwayazer.	She dressed him in baby clothes and laid him on a bed of hay, because there was no room for them in the inn.	He wrapped it in a basket and placed it in a manger, because there was no place for them in the room to travel.	3	4	0
38	Lerla li ti beni zot e li ti dir Marie, sa garson la pou abes ouswa pou relev boukou dan Izrael.	Then he blessed them and told Mary, this child of yours will cause many people in Israel to fall and others to stand.	Then he blessed them and said to Mary, the boy will be humiliated or will be raised a lot in Israel.	4	4	0
39	Zezi reponn li, kisannla mo mama e kisannla mo bann frer?	Jesus answered, who is my mother and who are my brothers?	Jesus replied, who is my mother and who are my brothers?	5	5	0
40	Enn lizie pou enn lizie e enn ledan pou enn ledan.	An eye for an eye and a tooth for a tooth.	A eye for an eye and a bone for a bone.	2	5	0
41	Dan enn let le 13 desam 2011, TEC ti bein kritik kont UTM.	In a letter dated 13 December 2011, the TEC has been very critical of the UTM.	In a letter on 13th December 2011, THE Eighth Column was criticized.	1	5	0
42	Li leve li al sers fimye, disab e li melanz dan later.	He then brings manure and sand and mixes both into the soil.	She wakes up to the fim, sand, and mixes it into the ground.	1	5	0
43	Uf! Sinn Sinn kwar li pu tom anba e li pu kas but but.	Oh! Sinn Sinn thinks he will fall down and break into pieces.	You’re crazy! Sinn Sinn thinks he will fall down and break the bits.	3	4	0
44	Li retourne e li trouv so bann disip pe dormi.	He came back and found his disciples sleeping.	He went back and found his disciples sleeping.	4	5	0
45	Lerla seki move pou zet zot dan sa gran dife-la, kot pou ena boukou plore ek kriye e grinsman ledan.	Then those evil people will be thrown into a flaming furnace, where they will cry and grit their teeth in pain.	Then the evil one will throw them into the great fire, where there will be a lot of crying and shouting and tears.	4	5	0
46	Sink tifi ladan ti insousian, e sink ti bien saz.	Five of the girls were foolish and five were wise.	Five girls were conscious, and five were well- sazed.	3	3	0
47	Li groyne enn ku... or r r r r r r r apre li zape, wow, wow, wow.	He suddenly snarls... ar r r r r r, then he barks, woof, woof, woof.	It rows a ku... or r r r r r r r r r r r rnd after it has been weighed, uh, oh, yeah, oh, yeah.	1	2	0
48	De bandi ti kouloute lor lakrwa ansam ar li, enn adrwat, lot la agos.	The soldiers also nailed two criminals on crosses, one to the right of Jesus and the other to his left.	The two bandi jumped over the cross with him, one on the right, the other on the left.	1	5	0
49	To enn serviter ki pa vo nanye, mo pou fer pran twa e zet twa deor dan nwar, kot pou ena boukou plore, kriye ek grinsman ledan.	You are a worthless servant, and you will be thrown out into the dark where people will cry and grit their teeth in pain.	You servant who don't want anything, I will take you and throw you out into the night, where there will be a lot of crying, shouting and tearning of teeth.	4	4	0
50	Zezi pa reponn lor okenn pwin e so silans ti bien inpresionn gouverner.	But Jesus did not say anything, and the governor was greatly amazed.	Jesus did not answer at once, and his silence was very persuasive to the governor.	3	5	0
				3.44	4.44	26

## Sheet: en-cr
Sentence ID	Input	Reference	Translation	Adequacy (1-5)	Fluency (1-5)	Translation better than reference (0/1)
1	If you love your father or mother or even your sons and daughters more than me, you are not fit to be my disciples.	Seki kontan so papa oubien so mama plis ki mwa, li pa dign pou vinn mo disip.	Si zot kontan zot papa ousa zot mama ousa mem zot garson ousa zot tifi plis ki mwa, zot pa pou kapav swiv mwa.	4	5	1
2	He will place the sheep on his right and the goats on his left.	Li pou met bann mouton dan so kote drwat e bann kabri dan so gos.	Li pou met mouton lor so drwat e kabri lor so gos.	5	5	0
3	As he walked along, he saw Levi, the son of Alphaeus.	Letan li ti pe pase, li trouv Levi, garson Alfe.	Ler li ti pe marse, li ti trouv Levi, garson Kne.	4	5	0
4	After 32 statements to the police, a hunger strike, newspaper articles, threats of prosecution and deportation, the case, like the battle of earthen pot against the iron pot, ended in water coil.	Apre 32 depozision lapolis, enn lagrev lafin, bann lartik dan lapres, bann menas pouswit e deportasion, zafer, avek zimaz komba po later kont po feray, finn terminn kont enn dilo boudin.	Apre depozisyon lapolis, enn lagrev lafin, lartik lagazet, menas akizasyon ek deportasion, ka la, kouma batay pot terin kont pot diferan, finn fini dan kolinn dilo.	3	4	0
5	Then the master said, now your money will be taken away and given to the servant with ten thousand coins.	Patron la dir aster mo pou repran sa talan la e mo pou donn li sa dimoun ki ena dis la.	Lerla patron dir, aster to larzan pou pran e donn serviter la avek mil larzan.	4	4	1
6	That's why a man leaves his father and mother and gets married.	Akoz samem enn zom pou kit so papa ek so mama pou li marie.	Akoz samem enn zom kit so papa ek so mama e marye.	5	5	1
7	This is why if you are about to place your gift on the altar and remember that you do not get along well with your brother leave your gift here, make peace with your brother, then come back and offer your gift to God.	Akoz samem si to vinn devan lotel pou ofer enn sakrifis e to rapel ki to pa bien ar to frer, les to ofrand lamem, rekonsilie ar to frer, apre to va prezant to ofrand Bondie.	Akoz samem kifer zot pre pou met zot kado dan later e zot pa rapel ki zot pa mars bien avek zot frer les zot kado isi, fer lape ar zot frer, lerla revinn e ofer zot kado Bondie.	3	4	0
8	He said to them, I am so sad that I feel as if I am dying.	Li dir zot, mo ranpli ar enn gran tristes koumadir mo pe mor.	Li ti dir zot, mo telman tris ki mo santi koumadir mo pe mor.	5	5	1
9	Large crowds followed him, and he healed their sick people.	Enn gran lafoul ti pe swiv li e li ti pe geri zot tou.	Lafoul ti swiv li, e li geri zot bann malad.	4	5	0
10	Jesus and the devil	Lespri ti ris Zezi dan dezer kot diab ti tant li.	Zezi ek maler.	5	5	1
11	One day, someone got the idea to sell large household items.	Enn zour enn dimoun ti gagn lide met anvant bann obze ki bar plas dan lakaz.	Enn zour kikenn ti gagn lide pou vann gran item lakaz.	5	5	1
12	Because it is not protected by an atmosphere as is the Earth, the Moon is not immune to such events - its reflected surface studded with craters.	Parski li pa proteze par enn latmosfer kouma later, lalinn pa proteze kont sa bann evennman la – so sirfas ranpli avek krater temwagne.	Li pa proteze par enn lanatmosfer kouma later, Lalinn pa inpir a sa kalite evennman-la - so sirfas re-kare ar kret.	3	4	0
13	The joiners and carpenters fended for themselves without too much trouble.	Bann bon menwizie ek sarpantie ti pe kapav debrouye san tro difikilte.	Bann zwenn ek sarpantie ti pe fennsi pou zotmem san tro boukou traka.	3	3	0
14	And I am not good enough even to stoop down and untie his sandals.	E mo pa ase bon, pou mo kourbe devan li, pou larg so sandalet.	E mo pa ase bon mem alonz so sandale.	1	3	0
15	But the demons knew who he was, and he did not let them speak.	Li ferm labous bann demon parski zot ti kone ki Zezi ete.	Me bann demon ti kone ki li ti ete, e li pa ti les zot koze.	5	5	1
16	The relationship between Dr. D.Y. Patil Medical College, represented by the company DYP Worldwide Ltd and UTM, was formalized in June 25, 2009 by the MoU.	Relasion ant Dr D.Y. Patil Medical College, reprezante par konpagni D.Y.P. Worldwide Ltd e UTM, ti ofisialize le 25 zwin 2009 par protokol lakor la.	Relasion ant Dr. D.Y. Patil Medical College, reprezante par konpayni DANTO Mondialwide AND U aldri, ti formelye an Zin 25, aldri par MoU.	2	3	0
17	He asked him, teacher, what is the most important commandment in the Law?	Li dir li, profeser, ki pli gran komannman dan lalwa?	Li ti dimann li, profeser, ki komannman pli inportan dan lalwa?
18	They were evolving naturally in a frankly difficult environment.	Zot ti pe evolie natirelman dan enn lanvironnman pourtan pa fasil.	Zot ti devlop natirelman dan enn lanvironnman byen difisil.	3	5	0
19	No one patches old clothes by sewing on a piece of new cloth.	Personn pa pran enn bout latwal ki pankor retresi pou rakomod enn vie linz.	Personn pa met vie linz par sez lor enn morso nef palto.	2	3	0
20	They will tell the people that he has been raised to life, and this last lie will be worse than the first one.	Zot pou fer lepep krwar, li finn resisite parmi bann mor, e sa mansonz la pou pli pir ki premie la.	Zot pou dir bann ki li finn res vivan e sa dernie manti pou pli pir ki premie.	3	4	0
21	”How can I find out where all the fish have gone?”, Zoko thinks about it.	“Kimanyer mo pu al rode ki kote pwason ete?”, Zoko kalkile.	“Kouma mo kapav dekuver kot tu pwason inn ale?”, Zoko panse.	5	5	1
22	When the girls got up and started getting their lamps ready, the foolish ones said to the others, let us have some of your oil.	Kan bann fidoner leve e koumans prepar zot lalanp, bann insousian la dimann bann seki bien saz la, er nou gagn inpe delwil ar zot.	Ler bann tifi leve e koumans prepar zot lalanp, bann bet dir lezot, les nou pran inpe to petrol.	5	5	1
23	All over Mauritius, fathers and mothers work hard during the year.	Partu kote dan Moris, bann papa ek bann mama travay dir tut long lane.	Tu Moris, papa ek mama travay dir pandan lane.	3	4	0
24	The 9-foot fish, caught in waters off Kjollefjord last month.	Sa pwason 9 pie la, ki finn maye dan dilo Koleford la mwa dernie.	Nifout pwason, ki ti may dan dilo ladan karant mwa.	1	4	0
25	Not far from there a large herd of pigs was feeding.	Ti ena enn troupo koson ki ti pe manze dan lezanviron.	Pa lwen depi laba ti ena enn gran troupo koson ki ti pe nouri.	5	5	1
26	From that day onwards the little hen becomes the Scarecrow’s friend.	Depi sa zur la tipul vinn kamarad ek Bonom Lapay.	Apartir sa zour la, Tipul-la vinn kamarad Scarekol.	3	4	0
27	People need every word that God has spoken.	Apre, diab ti amenn Zezi lavil sint e fer li dibout net lao lor tanp.	Bann dimounn bizin tou seki Bondie finn dir.	4	5	0
28	But when he came to it, he found only leaves and no figs.	Me kan li al pre ar li, li pa trouv okenn fri, me zis bann fey.	Me ler li ariv laba, li trouv zis fey e pa ti trouv fig.	5	5	1
29	Pilate asked them, what am I to do with Jesus, who is called the Messiah?	Pilat dimann zot, ki mo pou fer ar Zezi ki zot apel Lekris?	Pilat dimann zot, ki mo pou fer ar Zezi Lemesi?	5	5	1
30	Some of the people standing there heard Jesus and said, he's calling for Elijah.	Detrwa ki ti la tann sa e zot dir, li pe apel Eli.	Ena dimounn ki ti dibout laba ti tann Zezi e dir li, li pe kriye Eli.	5	5	1
31	My father, who took on more and more responsibilities as my grandfather got older, did everything in his power to buy Bhai Goolam’s land but our neighbour refused to sell because, and he would say this openly, he and his family felt safe in Camp Ramsamy.	Mo papa ki ti pe pran plis responsabilite amizir mo granper ti pe vieyi, ti fer tou pou aste teren Bay Goulam me nou vwazen ti refiz vande parski, li ti pe dir ouvertman, li ti santi li ek so fami ansekirite dan Kan Ramsamy.	Mo papa ki ti pran plis ek plis responsabilite kan mo granper ti vinn vie ti fer tou so pouvwar pou aste later Bay Goolam me nou vwazin ti refiz vann parski li ti pou dir tou seki ouver, li ek so fami ti santi dan Kan Ramsamy.	4	4	0
32	My ancestors came to the village back when the estates needed workers for the plantation.	Mo anset ti vinn dan vilaz lepok ki tabisman ti bizen travayer dan plantasion.	Mo bann anset ti revini dan vilaz kan tablisman ti bizen travayer pu plantasyon.	5	5	1
33	My cattle and prize calves have all been prepared.	Mo finn fini prepare mo bann toro ek mo bann zanimo bien gra.	Mo bebet ek mo bann kabri finn pare.	4	5	1
34	A large crowd gathered around him, and he taught them.	Enn gran lafoul antour li, li ti pe ansegn zot.	Enn gran lafoul ti rasanble otour li, e li ti ansegn zot.	5	5	1
35	One month later God sent the angel Gabriel to the town of Nazareth in Galilee with a message for a virgin named Mary.	Enn mwa plitar, Bondie avoy anz Gabriel dan lavil Nazaret dan Galile, avek enn mesaz pou enn vierz ki apel Mari.	Enn mwa pli tar Bondie ti avoy anz Gabriel dan lavil Nazaret dan Galile avek enn mesaz pou enn ki ti apel Mary.	4	5	0
36	I tell you that God's kingdom will be taken from you and given to people who will do what he demands.	Ala, mo dir zot, pou ras Rwayom Bondie ar zot e pou donn sa enn pep ki pou prodwir vre fri.	Mo dir zot, Rwayom Bondie pou pran ar zot e pou donn bann ki pou fer seki li dimande.	4	5	1
37	She dressed him in baby clothes and laid him on a bed of hay, because there was no room for them in the inn.	Li ti anvlop li dan lanz e plas li dan enn manzwar, parski pa ti ena plas pou zot dan lasal pou vwayazer.	Li ti abiye li dan enn ti linz e li ti poz li lor enn lili lerb parski pa ti ena lasam pou zot dan laboutik.	3	5	0
38	Then he blessed them and told Mary, this child of yours will cause many people in Israel to fall and others to stand.	Lerla li ti beni zot e li ti dir Marie, sa garson la pou abes ouswa pou relev boukou dan Izrael.	Lerla li beni zot e li dir Mari, to zanfan la pou fer boukou dimoun dan Izrael tom e lezot dimounn dibout.	4	4	0
39	Jesus answered, who is my mother and who are my brothers?	Zezi reponn li, kisannla mo mama e kisannla mo bann frer?	Zezi dir li, kisannla mo mama e kisannla mo bann frer?	5	5	0
40	An eye for an eye and a tooth for a tooth.	Enn lizie pou enn lizie e enn ledan pou enn ledan.	Lizie pou enn lizie e enn dant pou enn dant.	4	4	0
41	In a letter dated 13 December 2011, the TEC has been very critical of the UTM.	Dan enn let le 13 desam 2011, TEC ti bein kritik kont UTM.	Dan enn let dat 13 Desam 2011, LANGAZMAN-la finn bien kritik U.	2	2	0
42	He then brings manure and sand and mixes both into the soil.	Li leve li al sers fimye, disab e li melanz dan later.	Lerla li amenn inpir ek disab e li melanz toulede dan later.	3	5	0
43	Oh! Sinn Sinn thinks he will fall down and break into pieces.	Uf! Sinn Sinn kwar li pu tom anba e li pu kas but but.	Ah! Sinn Sinn panse li pu desann e kas an-de-trwa.	3	5	0
44	He came back and found his disciples sleeping.	Li retourne e li trouv so bann disip pe dormi.	Li ti retourne e li trouv so bann disip pe dormi.	5	5	1
45	Then those evil people will be thrown into a flaming furnace, where they will cry and grit their teeth in pain.	Lerla seki move pou zet zot dan sa gran dife-la, kot pou ena boukou plore ek kriye e grinsman ledan.	Lerla sa bann move dimounn-la pou zet dan enn ranpli ar dife, kot zot pou plore ek grins zot ledan dan douler.	3	4	0
46	Five of the girls were foolish and five were wise.	Sink tifi ladan ti insousian, e sink ti bien saz.	Sink tifi la ti bet e senk ti bien saz.	5	5	1
47	He suddenly snarls... ar r r r r r, then he barks, woof, woof, woof.	Li groyne enn ku... or r r r r r r r apre li zape, wow, wow, wow.	Enn sel kut... ar r r r r r r r r, lerla li tip e tap, waw, waw, waw.	1	1	0
48	The soldiers also nailed two criminals on crosses, one to the right of Jesus and the other to his left.	De bandi ti kouloute lor lakrwa ansam ar li, enn adrwat, lot la agos.	Bann solda osi krisifie de bandi ki ti ena enn kote drwat Zezi e lot kote gos.	5	5	1
49	You are a worthless servant, and you will be thrown out into the dark where people will cry and grit their teeth in pain.	To enn serviter ki pa vo nanye, mo pou fer pran twa e zet twa deor dan nwar, kot pou ena boukou plore, kriye ek grinsman ledan.	You servant who don't want anything, I will take you and throw you out into the night, where there will be a lot of crying, shouting and tearning of teeth.	3	4	0
50	But Jesus did not say anything, and the governor was greatly amazed.	Zezi pa reponn lor okenn pwin e so silans ti bien inpresionn gouverner.	Jesus did not answer at once, and his silence was very persuasive to the governor.	1	1	0
				3.73469	4.34694	40

## Sheet: cr-fr
Sentence ID	Input	Reference	Translation	Adequacy (1-5)	Fluency (1-5)	Translation better than reference (0/1)
1	Seki kontan so papa oubien so mama plis ki mwa, li pa dign pou vinn mo disip.	Si vous aimez votre père ou votre mère ou même vos fils et filles plus que moi, vous n'êtes pas dignes d'être mes disciples.	Si vous aimez votre père ou mère plus que moi, n'avez pas envie de devenir mon disciple.	5	5	1
2	Li pou met bann mouton dan so kote drwat e bann kabri dan so gos.	Il placera les brebis à sa droite, et les boucs à sa gauche.	Il mettra les moutons à sa droite et les brebis à sa gout.	3	3	0
3	Letan li ti pe pase, li trouv Levi, garson Alfe.	Comme il marchait, il vit Lévi,le fils d'Alphée.	Comme il se passait, il se trouva le Fils de Lévi, le fils d'Aphère.	2	4	0
4	Apre 32 depozision lapolis, enn lagrev lafin, bann lartik dan lapres, bann menas pouswit e deportasion, zafer, avek zimaz komba po later kont po feray, finn terminn kont enn dilo boudin.	Après 32 dépositions à la police, une grève de la faim, des articles de presse, des menaces de poursuites et de déportation, l’affaire, à l’image du combat du pot de terre contre le pot de fer, s’est terminée en eau de boudin.	Après 32 depositions de la police, une lutte de fin, des articles dans la presse, des menaces de la poussée et des déportations, des choses et l'image de combattre les mauvaises herbes contre les fers, sont brisés de l'eau.	3	3	0
5	Patron la dir aster mo pou repran sa talan la e mo pou donn li sa dimoun ki ena dis la.	Alors le maître dit, maintenant votre argent vous sera enlevé et donné à la servante de dix mille pièces.	Le maître dit que je vais maintenant reprendre ce talentueux et lui donner ce qui a dix.	3	4	1
6	Akoz samem enn zom pou kit so papa ek so mama pou li marie.	C'est pourquoi l'homme quittera son père et sa mère et se marie.	C'est pourquoi un homme qui va s'enfuir à cause de son père et de sa mère va se marier.	2	5	0
7	Akoz samem si to vinn devan lotel pou ofer enn sakrifis e to rapel ki to pa bien ar to frer, les to ofrand lamem, rekonsilie ar to frer, apre to va prezant to ofrand Bondie.	C'est pourquoi si tu es sur le point de placer ton cadeau sur l'autel et te rappelles que tu ne t’entends pas bien avec ton frère laisse là ton offrande, fais la paix avec ton frère, puis viens présenter ton offrande à Dieu.	C'est pourquoi, si vous êtes venu à la maison pour faire un sacrifice et vous ne savez pas que vous n'êtes pas bien à votre frère, abandonnez votre offer à votre propre frère, résiliez à votre frère, apre que vous abandonnez votre offer à Dieu.	3	4	0
8	Li dir zot, mo ranpli ar enn gran tristes koumadir mo pe mor.	Il leur dit: Je suis si triste que je sens comme si je meurs.	Il leur a dit, je suis plein d'une grande tristesse, comme je suis mort.	3	4	0
9	Enn gran lafoul ti pe swiv li e li ti pe geri zot tou.	De grandes foules le suivirent, et il guérit les malades.	Une grande foule s'approcha de lui et il guérit tous les malades.	4	5	1
10	Lespri ti ris Zezi dan dezer kot diab ti tant li.	Le Saint-Esprit conduisit Jésus dans le désert, de sorte que le diable puisse le tester.	L'esprit a amené Jésus dans le désert où le diable lui a frappé.	3	5	0
11	Enn zour enn dimoun ti gagn lide met anvant bann obze ki bar plas dan lakaz.	Un jour, quelqu'un a eu l'idée de vendre de grands articles ménagers.	Un jour, quelqu'un a eu l'idée de mettre en place des choses qui barchaient dans la maison.	5	5	1
12	Parski li pa proteze par enn latmosfer kouma later, lalinn pa proteze kont sa bann evennman la – so sirfas ranpli avek krater temwagne.	Parce qu'elle n'est pas protégée par une atmosphère comme l'est la Terre, la Lune n'est pas à l'abri de ce genre d'événements - sa surface constellée de cratères en témoigne.	Because it n’est pas protected par l’atmosphère comme la terre, la lune n’est pas protected contre les Événements – son surface est pleine de témoins.	1	1	0
13	Bann bon menwizie ek sarpantie ti pe kapav debrouye san tro difikilte.	Les menuisiers et charpentiers se débrouillèrent sans trop de peine.	Les bons menuisiers et les charpentiers ont essayé de se débrouiller sans trop de difficulté.	4	5	0
14	E mo pa ase bon, pou mo kourbe devan li, pou larg so sandalet.	Et je ne suis pas assez bon même pour me baisser et délier ses sandales.	Et je n'ai pas assez de bon, pour le bouger devant lui, pour le débarrasser de sa sandale.	3	5	0
15	Li ferm labous bann demon parski zot ti kone ki Zezi ete.	Mais les démons savaient qui il était, et il ne les laissait pas parler.	Il a effrayé les démons parski ils savaient qu' Jésus était.	2	3	0
16	Relasion ant Dr D.Y. Patil Medical College, reprezante par konpagni D.Y.P. Worldwide Ltd e UTM, ti ofisialize le 25 zwin 2009 par protokol lakor la.	La relation entre le Dr D.Y. Patil Medical College, repré­senté par la compagnie D.Y.P. Worldwide Ltd et l’UTM, a été officialisée le 25 juin 2009 par ce protocole d’accord.	Une réunion entre le Dr D.Y. Patil Medical College, représenté par lapagni D.Y.P. Worldwide, et l’U kind, était officialisée le 25 janvier 2006 par le protocole d’accord.	3	4	0
17	Li dir li, profeser, ki pli gran komannman dan lalwa?	Il lui a demandé, professeur, quel est le plus grand commandement de la loi?	Il a demandé, professeur, quel est le premier commandement de la loi?	4	5	0
18	Zot ti pe evolie natirelman dan enn lanvironnman pourtan pa fasil.	Ils évoluaient naturellement dans un environnement franchement difficile.	Ils élevaient naturalement dans un milieu qui n’est pas facile encore.	4	5	0
19	Personn pa pran enn bout latwal ki pankor retresi pou rakomod enn vie linz.	Personne ne raccomode de vieux vêtements en y cousant un morceau de tissu neuf.	Personne ne prend une coupe de latrine qui n’est pas encore comprimée pour reraciner une vieille robe.	1	3	0
20	Zot pou fer lepep krwar, li finn resisite parmi bann mor, e sa mansonz la pou pli pir ki premie la.	Ils vont dire aux gens qu'il a été ramené à la vie, et ce dernier mensonge sera pire que le premier.	Ils vont le croyez, il est ressuscité parmi les morts, et cette mangue sera encore plus pire que la première.	2	3	0
21	“Kimanyer mo pu al rode ki kote pwason ete?”, Zoko kalkile.	Comment puis-je savoir où tous les poissons ont disparu? , Zoko y pense.	Comment dois-je aller chercher le côté du poisson? , dit Zoko.	2	4	0
22	Kan bann fidoner leve e koumans prepar zot lalanp, bann insousian la dimann bann seki bien saz la, er nou gagn inpe delwil ar zot.	Quand les filles se sont levés et ont commencé à recevoir leurs lampes prêt, les folles dirent aux autres, laissez-nous un peu de votre huile.	Quand les prêtres se lèvent et commencent à travailler leurs lampes, les innocents se demandant des gens qui sont sazzes, il y a un peu d'huile à eux.	2	3	0
23	Partu kote dan Moris, bann papa ek bann mama travay dir tut long lane.	Partout à l'île Maurice, les pères et les mères travaillent dur pendant l'année.	Partu dans l'île Maurice, les pères et les mères travaillent très dur toute la journée.	3	4	0
24	Sa pwason 9 pie la, ki finn maye dan dilo Koleford la mwa dernie.	Le poisson de 9 pieds, capturé dans les eaux au large de Kjollefjord le mois dernier.	Le poisson de l'arbre 9, qui a été saisi dans l'eau de la colle est mon dernier.	1	1	0
25	Ti ena enn troupo koson ki ti pe manze dan lezanviron.	Non loin de là un grand troupeau de porcs se nourrissait.	Il y avait un troupeau de cochon qui mangeait dans l'air.	3	4	0
26	Depi sa zur la tipul vinn kamarad ek Bonom Lapay.	Dès ce jour-là la petite poule devient l'ami de l'épouvantail.	Cette fois-ci, la petite poule est devenue de notre ami et de notre Pâte.	2	3	0
27	Apre, diab ti amenn Zezi lavil sint e fer li dibout net lao lor tanp.	Ensuite, le diable a emmené Jésus dans la ville sainte et le fit tenir sur la partie la plus haute du temple.	Ensuite, le diable a amené Jésus à la ville et l'a fait se mettre tout droit sur le Temple.	2	3	0
28	Me kan li al pre ar li, li pa trouv okenn fri, me zis bann fey.	Mais quand il est venu à lui, il ne trouva que des feuilles et pas de figues.	Mais quand il s'approcha d'elle, il ne vit pas de fruits, mais des feuilles seulement.	4	5	0
29	Pilat dimann zot, ki mo pou fer ar Zezi ki zot apel Lekris?	Pilate leur dit: que dois-je faire avec Jésus, qui est appelé le Messie?	Pilate répondit: Que dois-je faire avec Jésus, qu'on appelle l'église?	3	4	0
30	Detrwa ki ti la tann sa e zot dir, li pe apel Eli.	Certaines des personnes qui se tenaient là entendirent Jésus et dirent: il appelle Élie.	Certains ont entendu parler de ceci et ont dit, son nom est Élie.	4	5	0
31	Mo papa ki ti pe pran plis responsabilite amizir mo granper ti pe vieyi, ti fer tou pou aste teren Bay Goulam me nou vwazen ti refiz vande parski, li ti pe dir ouvertman, li ti santi li ek so fami ansekirite dan Kan Ramsamy.	Mon père, qui prenait de plus en plus de responsabilités comme mon grand-père vieillissait, faisait tout en son pouvoir pour acheter la terre de Bhai Goolam mais notre voisin refusait de vendre parce que, et il disait cela ouvertement, lui et sa famille se sentaient en sécurité dans le camp Ramsamy.	Mon père qui faisait plus de responsabilité à cause de mon grand-père était vieilli, faisait tout pour acheter du site de Bay Goulam, mais notre voisin refusait de vander, parce qu'il a dit à l'ouest, qu'il était senti avec sa famille en sécurité dans Camp Ramsamy.	3	3	0
32	Mo anset ti vinn dan vilaz lepok ki tabisman ti bizen travayer dan plantasion.	Mes ancêtres sont venus au village dans le passé quand les établissements avaient besoin de travailleurs pour la plantation.	Mon ancêtre est venu dans le village quand les plantations avaient besoin de travailleurs.	4	5	0
33	Mo finn fini prepare mo bann toro ek mo bann zanimo bien gra.	Mes bovins et de veaux de valeur ont tous été préparés.	J'ai fini de travailler mes Touris et mes animaux très intelligents.	2	2	0
34	Enn gran lafoul antour li, li ti pe ansegn zot.	Une foule nombreuse se rassembla autour de lui, et il leur enseigna.	Une grande foule l’entourait, il leur a dit.	2	4	0
35	Enn mwa plitar, Bondie avoy anz Gabriel dan lavil Nazaret dan Galile, avek enn mesaz pou enn vierz ki apel Mari.	Un mois plus tard, Dieu envoya l'ange Gabriel dans la ville de Nazareth, en Galilée, avec un message pour une vierge nommée Marie.	Un jour plus tard, Dieu a envoyé unange Gabriel dans la ville de Nazareth en Galilée, avec une message à un homme appelé Marie.	2	3	0
36	Ala, mo dir zot, pou ras Rwayom Bondie ar zot e pou donn sa enn pep ki pou prodwir vre fri.	Je vous dis que le royaume de Dieu vous sera enlevé et donné à des gens qui vont faire ce qu'il demande.	Je vous dis que vous serez rassemblés du royaume des cieux et given à quiconque un produit de vrai fruits.	2	4	0
37	Li ti anvlop li dan lanz e plas li dan enn manzwar, parski pa ti ena plas pou zot dan lasal pou vwayazer.	Elle l’a habillé dans des vêtements de bébé et l’a couché sur un lit de foin, parce qu'il n'y avait pas de place pour eux à l'auberge.	Il s'enveloppe dans une élagage et la place dans une manger, parce qu'il n'y avait pas de place pour les locataires dans la salle de voyager.	3	3	0
38	Lerla li ti beni zot e li ti dir Marie, sa garson la pou abes ouswa pou relev boukou dan Izrael.	Puis il les bénit et dit à Marie, votre enfant va causer beaucoup de gens en Israël à tomber et les autres à se tenir debout.	Puis il leur a bénie et dit à Marie, cet garçon va s'habillé ou se rélever beaucoup d'Israël.	3	3	0
39	Zezi reponn li, kisannla mo mama e kisannla mo bann frer?	Jésus répondit: Qui est ma mère et qui sont mes frères?	Jésus lui répondit: Qui est ma mère et qui est mes frères?	4	4	0
40	Enn lizie pou enn lizie e enn ledan pou enn ledan.	Oeil pour oeil, dent pour dent.	Un oeil sera un yeux et un dedan sera un dedan.	1	1	0
41	Dan enn let le 13 desam 2011, TEC ti bein kritik kont UTM.	Dans une lettre en date du 13 décembre 2011, la TEC s’est montrée très critique envers l’UTM.	Dans une lettre le 13 décembre 2011, Rien n’a été kritiké contre vous.	1	5	0
42	Li leve li al sers fimye, disab e li melanz dan later.	Il apporte alors du fumier et du sable et mélange les deux dans le sol.	Il se leva et se promène dans le champ pour regarder des films, le disab.	1	2	0
43	Uf! Sinn Sinn kwar li pu tom anba e li pu kas but but.	Oh! Sinn Sinn pense qu'il va tomber et se briser en morceaux.	Automne! Sinn Sinn se croit qu’il va tomber et éclater les bouteilles.	1	4	0
44	Li retourne e li trouv so bann disip pe dormi.	Il revint et trouva ses disciples endormis.	Il revint et vit que ses disciples dormaient.	5	5	1
45	Lerla seki move pou zet zot dan sa gran dife-la, kot pou ena boukou plore ek kriye e grinsman ledan.	Alors ces gens méchants seront jetés dans une fournaise enflammée, où ils vont pleurer et grincer les dents de douleur.	Ensuite, si vous êtes mal élevé, vous zettez dans le feu de toutes sortes, et il y aura beaucoup de pleurer et de crier et de grincer les dents.	3	3	0
46	Sink tifi ladan ti insousian, e sink ti bien saz.	Cinq des filles étaient folles, et cinq sages.	Les cinq petites filles étaient intelligentes, et les cinq étaient très sazses.	1	5	0
47	Li groyne enn ku... or r r r r r r r apre li zape, wow, wow, wow.	Il gronde soudain ... ar r r r r r, alors il aboie, woof, woof, woof.	Il y a un coup d'... ou de ro rocher de rocher de rocher de plus tard son générateur, générateur, générateur.	1	1	0
48	De bandi ti kouloute lor lakrwa ansam ar li, enn adrwat, lot la agos.	Les soldats ont aussi cloué sur des croix deux malfaiteurs, l'un à la droite de Jésus et l'autre à sa gauche.	Les deux frères ont roulé sur la croix avec lui, une à l'autre, l'autre à l'autre.	1	2	0
49	To enn serviter ki pa vo nanye, mo pou fer pran twa e zet twa deor dan nwar, kot pou ena boukou plore, kriye ek grinsman ledan.	Vous êtes un serviteur inutile, et que vous serez jetés dehors dans les ténèbres où les gens vont pleurer et grincer les dents de douleur.	Un serviteur qui n'a pas envie de rien, je vais vous charger et vous zet dans la nuit où beaucoup vont pleurer, crier et vous grincer les dents.	2	4	0
50	Zezi pa reponn lor okenn pwin e so silans ti bien inpresionn gouverner.	Mais Jésus ne dit rien, et le gouverneur était grandement étonné.	Jésus n'a pas répondu sur un point et son silence était très persuasive le gouverneur.	4	5	1
				2.64	3.7	12

## Sheet: fr-cr
Sentence ID	Input	Reference	Translation	Adequacy (1-5)	Fluency (1-5)	Translation better than reference (0/1)
1	Si vous aimez votre père ou votre mère ou même vos fils et filles plus que moi, vous n'êtes pas dignes d'être mes disciples.	Seki kontan so papa oubien so mama plis ki mwa, li pa dign pou vinn mo disip.	Si zot kontan zot papa ousa zot mama ousa zot garson ousa zot tifi plis ki mwa, zot pa bizin dir ki zot bann disip.	5	5	1
2	Il placera les brebis à sa droite, et les boucs à sa gauche.	Li pou met bann mouton dan so kote drwat e bann kabri dan so gos.	Li pou met bann zwazo dan so drwat, e bann zwazo dan so gos.	1	5	0
3	Comme il marchait, il vit Lévi,le fils d'Alphée.	Letan li ti pe pase, li trouv Levi, garson Alfe.	Letan li pe ale, li trouv Levi, garson Lalfe.	4	5	0
4	Après 32 dépositions à la police, une grève de la faim, des articles de presse, des menaces de poursuites et de déportation, l’affaire, à l’image du combat du pot de terre contre le pot de fer, s’est terminée en eau de boudin.	Apre 32 depozision lapolis, enn lagrev lafin, bann lartik dan lapres, bann menas pouswit e deportasion, zafer, avek zimaz komba po later kont po feray, finn terminn kont enn dilo boudin.	Apre depozision lapolis, enn gran lafaminn, bann lartik lagazet, bann akizasion ek deportasion, biznes, zimaz batay pot deter kont pot fer, finn fini dan dilo bouzinn.	5	5	0
5	Alors le maître dit, maintenant votre argent vous sera enlevé et donné à la servante de dix mille pièces.	Patron la dir aster mo pou repran sa talan la e mo pou donn li sa dimoun ki ena dis la.	Alors patron dir, aster to larzan pou leve e donn serviter mil pies.	4	5	1
6	C'est pourquoi l'homme quittera son père et sa mère et se marie.	Akoz samem enn zom pou kit so papa ek so mama pou li marie.	Akoz samem dimounn-la kit so papa, so mama, li marye.	4	5	0
7	C'est pourquoi si tu es sur le point de placer ton cadeau sur l'autel et te rappelles que tu ne t’entends pas bien avec ton frère laisse là ton offrande, fais la paix avec ton frère, puis viens présenter ton offrande à Dieu.	Akoz samem si to vinn devan lotel pou ofer enn sakrifis e to rapel ki to pa bien ar to frer, les to ofrand lamem, rekonsilie ar to frer, apre to va prezant to ofrand Bondie.	Akoz samem zot pe rod plas zot kado dan lotel e akoz zot pa tande ar zot frer, les zot ale, fer lape ar zot frer, e apre sa vini pou prezant zotrande Bondie.	4	5	0
8	Il leur dit: Je suis si triste que je sens comme si je meurs.	Li dir zot, mo ranpli ar enn gran tristes koumadir mo pe mor.	Li dir zot, mo telman tris ki mo santi koumadir mo pe bwar.	3	5	0
9	De grandes foules le suivirent, et il guérit les malades.	Enn gran lafoul ti pe swiv li e li ti pe geri zot tou.	Enn gran lafoul swiv li, e li geri bann maladi.	4	5	0
10	Le Saint-Esprit conduisit Jésus dans le désert, de sorte que le diable puisse le tester.	Lespri ti ris Zezi dan dezer kot diab ti tant li.	Lespri Sin pe konseye Zezi dan dezer pouki diab kapav piez li.	3	5	0
11	Un jour, quelqu'un a eu l'idée de vendre de grands articles ménagers.	Enn zour enn dimoun ti gagn lide met anvant bann obze ki bar plas dan lakaz.	Enn zour kikenn ti gagn lide vann gran lartik dan lakaz.	5	5	1
12	Parce qu'elle n'est pas protégée par une atmosphère comme l'est la Terre, la Lune n'est pas à l'abri de ce genre d'événements - sa surface constellée de cratères en témoigne.	Parski li pa proteze par enn latmosfer kouma later, lalinn pa proteze kont sa bann evennman la – so sirfas ranpli avek krater temwagne.	Parski li pa akoz enn latmosfer kouma later, Lalinn pa akoz sa kalite evennman-la - so sirfas konstle par kreer temwagne.	3	3	0
13	Les menuisiers et charpentiers se débrouillèrent sans trop de peine.	Bann bon menwizie ek sarpantie ti pe kapav debrouye san tro difikilte.	Bann menizie ek sarpantie larg zot dousma.	3	5	0
14	Et je ne suis pas assez bon même pour me baisser et délier ses sandales.	E mo pa ase bon, pou mo kourbe devan li, pou larg so sandalet.	E mo pa ase bon mem pou mwa fer mwa devalie so sandale.	1	2	0
15	Mais les démons savaient qui il était, et il ne les laissait pas parler.	Li ferm labous bann demon parski zot ti kone ki Zezi ete.	Me bann demon ti kone ki li ti ete, e li pa ti les zot koze.	5	5	1
16	La relation entre le Dr D.Y. Patil Medical College, repré­senté par la compagnie D.Y.P. Worldwide Ltd et l’UTM, a été officialisée le 25 juin 2009 par ce protocole d’accord.	Relasion ant Dr D.Y. Patil Medical College, reprezante par konpagni D.Y.P. Worldwide Ltd e UTM, ti ofisialize le 25 zwin 2009 par protokol lakor la.	Relasion ant Dr D.Y. Patil Medical College, presente par REprezante par REprezante G.Y.P. Worldwide, e Gym, finn ofisyaliz sa protokol lakor la par sa protokol la.	3	5	0
17	Il lui a demandé, professeur, quel est le plus grand commandement de la loi?	Li dir li, profeser, ki pli gran komannman dan lalwa?	Li dir li, profeser, ki pli gran komannman lalwa ete?	5	5	0
18	Ils évoluaient naturellement dans un environnement franchement difficile.	Zot ti pe evolie natirelman dan enn lanvironnman pourtan pa fasil.	Zot ti Evolie natirelman dan enn rezime trifisil.	3	5	0
19	Personne ne raccomode de vieux vêtements en y cousant un morceau de tissu neuf.	Personn pa pran enn bout latwal ki pankor retresi pou rakomod enn vie linz.	Personn pa rekoud bann vie linz ena enn morso nef latwal.	3	3	0
20	Ils vont dire aux gens qu'il a été ramené à la vie, et ce dernier mensonge sera pire que le premier.	Zot pou fer lepep krwar, li finn resisite parmi bann mor, e sa mansonz la pou pli pir ki premie la.	Zot pou dir bann dimounn ki finn fabrik li dan lavi, e sa dernie manson pou pli pir ki premie.	2	3	0
21	Comment puis-je savoir où tous les poissons ont disparu? , Zoko y pense.	“Kimanyer mo pu al rode ki kote pwason ete?”, Zoko kalkile.	“Kouma mo kapav kone kot tu pwason inn disparet?”, Zoko panse.	5	5	1
22	Quand les filles se sont levés et ont commencé à recevoir leurs lampes prêt, les folles dirent aux autres, laissez-nous un peu de votre huile.	Kan bann fidoner leve e koumans prepar zot lalanp, bann insousian la dimann bann seki bien saz la, er nou gagn inpe delwil ar zot.	Letan bann tifi leve e zot koumans gagn zot lalanp pare, bann mwano dir lezot, les nou inpe enn ti delwil.	2	5	0
23	Partout à l'île Maurice, les pères et les mères travaillent dur pendant l'année.	Partu kote dan Moris, bann papa ek bann mama travay dir tut long lane.	Partu dan Moris, papa ek mama travay dir pandan lane.	5	5	1
24	Le poisson de 9 pieds, capturé dans les eaux au large de Kjollefjord le mois dernier.	Sa pwason 9 pie la, ki finn maye dan dilo Koleford la mwa dernie.	Nipie, captir dan dilo lao lao dan rele 93 minit dernie.	1	1	0
25	Non loin de là un grand troupeau de porcs se nourrissait.	Ti ena enn troupo koson ki ti pe manze dan lezanviron.	Oparavan laba ti ena enn gro troupo koson ki ti pe nouri.	3	5	0
26	Dès ce jour-là la petite poule devient l'ami de l'épouvantail.	Depi sa zur la tipul vinn kamarad ek Bonom Lapay.	Samem zour la ti poul vinn kamarad bann feyton.	2	5	0
27	Ensuite, le diable a emmené Jésus dans la ville sainte et le fit tenir sur la partie la plus haute du temple.	Apre, diab ti amenn Zezi lavil sint e fer li dibout net lao lor tanp.	Lerla diab-la amenn Zezi dan lavil sin e li dibout li lor pli ot kote tanp.	3	4	0
28	Mais quand il est venu à lui, il ne trouva que des feuilles et pas de figues.	Me kan li al pre ar li, li pa trouv okenn fri, me zis bann fey.	Me ler li ariv kot li, li pa trouv fey e pa trouv fig.	4	5	0
29	Pilate leur dit: que dois-je faire avec Jésus, qui est appelé le Messie?	Pilat dimann zot, ki mo pou fer ar Zezi ki zot apel Lekris?	Pilat dir zot, ki mo bizen fer avek Zezi, ki apel Lemesi?	5	5	1
30	Certaines des personnes qui se tenaient là entendirent Jésus et dirent: il appelle Élie.	Detrwa ki ti la tann sa e zot dir, li pe apel Eli.	Ena dimoun ki ti pe atann laba ti tann Zezi e dir li apel Eli.	4	5	1
31	Mon père, qui prenait de plus en plus de responsabilités comme mon grand-père vieillissait, faisait tout en son pouvoir pour acheter la terre de Bhai Goolam mais notre voisin refusait de vendre parce que, et il disait cela ouvertement, lui et sa famille se sentaient en sécurité dans le camp Ramsamy.	Mo papa ki ti pe pran plis responsabilite amizir mo granper ti pe vieyi, ti fer tou pou aste teren Bay Goulam me nou vwazen ti refiz vande parski, li ti pe dir ouvertman, li ti santi li ek so fami ansekirite dan Kan Ramsamy.	Mo papa ki ti pe pran anplis karem kouma mo granper ti vie ti fer tou pou aste later Bay Goolam me nou vwazin ti refiz vande parski li ti dir tou seki ouver, li ek so fami ti pe santi dan kan Ramsamy.	2	3	0
32	Mes ancêtres sont venus au village dans le passé quand les établissements avaient besoin de travailleurs pour la plantation.	Mo anset ti vinn dan vilaz lepok ki tabisman ti bizen travayer dan plantasion.	Mo bann anset ti vinn dan vilaz dan lepase kan bann travayer ti bizen travay pou plantasion.	4	5	0
33	Mes bovins et de veaux de valeur ont tous été préparés.	Mo finn fini prepare mo bann toro ek mo bann zanimo bien gra.	Tou mo bwar ek tou mo ver valer ti pare.	1	2	0
34	Une foule nombreuse se rassembla autour de lui, et il leur enseigna.	Enn gran lafoul antour li, li ti pe ansegn zot.	Enn lafoul zennfi ti rasanble otur li, e li ti ansegnon zot.	4	4	1
35	Un mois plus tard, Dieu envoya l'ange Gabriel dans la ville de Nazareth, en Galilée, avec un message pour une vierge nommée Marie.	Enn mwa plitar, Bondie avoy anz Gabriel dan lavil Nazaret dan Galile, avek enn mesaz pou enn vierz ki apel Mari.	Enn mwa pli tar, Bondie ti anvway anz Gabriel dan lavil Nazaret dan Galile, avek enn mesaz pou enn zenn nimero Marie.	3	3	0
36	Je vous dis que le royaume de Dieu vous sera enlevé et donné à des gens qui vont faire ce qu'il demande.	Ala, mo dir zot, pou ras Rwayom Bondie ar zot e pou donn sa enn pep ki pou prodwir vre fri.	Mo dir zot, Rwayom Bondie pou lev zot e donn zot bann ki pou fer seki li dimande.	4	4	1
37	Elle l’a habillé dans des vêtements de bébé et l’a couché sur un lit de foin, parce qu'il n'y avait pas de place pour eux à l'auberge.	Li ti anvlop li dan lanz e plas li dan enn manzwar, parski pa ti ena plas pou zot dan lasal pou vwayazer.	Li finn abiye li dan enn ti linz e li ti asiz lor lili lafwa parski pa ti ena plas pou zot dan loberz.	1	4	0
38	Puis il les bénit et dit à Marie, votre enfant va causer beaucoup de gens en Israël à tomber et les autres à se tenir debout.	Lerla li ti beni zot e li ti dir Marie, sa garson la pou abes ouswa pou relev boukou dan Izrael.	Lerla li beni zot e li dir Mari, to zanfan pou fer boukou dimoun dan Izrael tom e lezot pou dibout.	4	4	0
39	Jésus répondit: Qui est ma mère et qui sont mes frères?	Zezi reponn li, kisannla mo mama e kisannla mo bann frer?	Zezi reponn, kisannla mo mama, kisannla mo frer?	5	5	1
40	Oeil pour oeil, dent pour dent.	Enn lizie pou enn lizie e enn ledan pou enn ledan.	Lizie, lizo, lizo.	1	1	0
41	Dans une lettre en date du 13 décembre 2011, la TEC s’est montrée très critique envers l’UTM.	Dan enn let le 13 desam 2011, TEC ti bein kritik kont UTM.	Dan enn let dat 13 Dimans 2011, LANGAZMAN la osi ti vinn kritik anver LANGAZMAN.	1	2	0
42	Il apporte alors du fumier et du sable et mélange les deux dans le sol.	Li leve li al sers fimye, disab e li melanz dan later.	Alor li pran fimie ek dible e li melanz zot de dan later.	3	5	0
43	Oh! Sinn Sinn pense qu'il va tomber et se briser en morceaux.	Uf! Sinn Sinn kwar li pu tom anba e li pu kas but but.	Ah! Sinn Sinn panse li pou tonbe, al kase.	3	3	0
44	Il revint et trouva ses disciples endormis.	Li retourne e li trouv so bann disip pe dormi.	Li revini e li trouv so bann disip pe dormi.	5	5	0
45	Alors ces gens méchants seront jetés dans une fournaise enflammée, où ils vont pleurer et grincer les dents de douleur.	Lerla seki move pou zet zot dan sa gran dife-la, kot pou ena boukou plore ek kriye e grinsman ledan.	Lerla bann move dimounn-la pou zet dan enn fourez anflame, kot zot pou plore ek grins zot ledan avek douler.	4	5	0
46	Cinq des filles étaient folles, et cinq sages.	Sink tifi ladan ti insousian, e sink ti bien saz.	sink tifi ti konekte, e sink saz.	2	5	0
47	Il gronde soudain ... ar r r r r r, alors il aboie, woof, woof, woof.	Li groyne enn ku... or r r r r r r r apre li zape, wow, wow, wow.	Li irle toutswit... ar rwarwa rwa rwa, lerla li abwaye, waw, waw, waw.	1	1	0
48	Les soldats ont aussi cloué sur des croix deux malfaiteurs, l'un à la droite de Jésus et l'autre à sa gauche.	De bandi ti kouloute lor lakrwa ansam ar li, enn adrwat, lot la agos.	Bann solda osi krisifie de malfeter, enn a drwat Zezi ek enn a gos.	5	5	1
49	Vous êtes un serviteur inutile, et que vous serez jetés dehors dans les ténèbres où les gens vont pleurer et grincer les dents de douleur.	To enn serviter ki pa vo nanye, mo pou fer pran twa e zet twa deor dan nwar, kot pou ena boukou plore, kriye ek grinsman ledan.	Zot enn serviter vid e zot pou zet dan marenwar kot dimounn pou plore ek grins zot ledan douler.	4	5	0
50	Mais Jésus ne dit rien, et le gouverneur était grandement étonné.	Zezi pa reponn lor okenn pwin e so silans ti bien inpresionn gouverner.	Me Zezi pa dir nanye, e gouverner la ti etone.	4	5	1
				3.3	4.24	26

## Sheet: Samples
Seki kontan so papa oubien so mama plis ki mwa, li pa dign pou vinn mo disip.	If you love your father or mother or even your sons and daughters more than me, you are not fit to be my disciples.	Si vous aimez votre père ou votre mère ou même vos fils et filles plus que moi, vous n'êtes pas dignes d'être mes disciples.	If you love your father or mother more than me, you don’t have to be my disciple.	Si zot kontan zot papa ousa zot mama ousa mem zot garson ousa zot tifi plis ki mwa, zot pa pou kapav swiv mwa.	Si vous aimez votre père ou mère plus que moi, n'avez pas envie de devenir mon disciple.	Si zot kontan zot papa ousa zot mama ousa zot garson ousa zot tifi plis ki mwa, zot pa bizin dir ki zot bann disip.
Li pou met bann mouton dan so kote drwat e bann kabri dan so gos.	He will place the sheep on his right and the goats on his left.	Il placera les brebis à sa droite, et les boucs à sa gauche.	He will put the sheep on his right side and the goats on his left side.	Li pou met mouton lor so drwat e kabri lor so gos.	Il mettra les moutons à sa droite et les brebis à sa gout.	Li pou met bann zwazo dan so drwat, e bann zwazo dan so gos.
Letan li ti pe pase, li trouv Levi, garson Alfe.	As he walked along, he saw Levi, the son of Alphaeus.	Comme il marchait, il vit Lévi,le fils d'Alphée.	As he was walking, he saw Levi, the son of the Cowshed.	Ler li ti pe marse, li ti trouv Levi, garson Kne.	Comme il se passait, il se trouva le Fils de Lévi, le fils d'Aphère.	Letan li pe ale, li trouv Levi, garson Lalfe.
Apre 32 depozision lapolis, enn lagrev lafin, bann lartik dan lapres, bann menas pouswit e deportasion, zafer, avek zimaz komba po later kont po feray, finn terminn kont enn dilo boudin.	After 32 statements to the police, a hunger strike, newspaper articles, threats of prosecution and deportation, the case, like the battle of earthen pot against the iron pot, ended in water coil.	Après 32 dépositions à la police, une grève de la faim, des articles de presse, des menaces de poursuites et de déportation, l’affaire, à l’image du combat du pot de terre contre le pot de fer, s’est terminée en eau de boudin.	After 32 depositions of the police, a strike of the late, articles in the press, assaults on the prompt and prompt deportation, and things with the stupid stupidity of the fight against the iron against the iron bark, have been put to an end with boiling water.	Apre depozisyon lapolis, enn lagrev lafin, lartik lagazet, menas akizasyon ek deportasion, ka la, kouma batay pot terin kont pot diferan, finn fini dan kolinn dilo.	Après 32 depositions de la police, une lutte de fin, des articles dans la presse, des menaces de la poussée et des déportations, des choses et l'image de combattre les mauvaises herbes contre les fers, sont brisés de l'eau.	Apre depozision lapolis, enn gran lafaminn, bann lartik lagazet, bann akizasion ek deportasion, biznes, zimaz batay pot deter kont pot fer, finn fini dan dilo bouzinn.
Patron la dir aster mo pou repran sa talan la e mo pou donn li sa dimoun ki ena dis la.	Then the master said, now your money will be taken away and given to the servant with ten thousand coins.	Alors le maître dit, maintenant votre argent vous sera enlevé et donné à la servante de dix mille pièces.	The boss says now I will pick up the talent and give him the one who has ten.	Lerla patron dir, aster to larzan pou pran e donn serviter la avek mil larzan.	Le maître dit que je vais maintenant reprendre ce talentueux et lui donner ce qui a dix.	Alors patron dir, aster to larzan pou leve e donn serviter mil pies.
Akoz samem enn zom pou kit so papa ek so mama pou li marie.	That's why a man leaves his father and mother and gets married.	C'est pourquoi l'homme quittera son père et sa mère et se marie.	That is why a man will leave his father and mother to marry.	Akoz samem enn zom kit so papa ek so mama e marye.	C'est pourquoi un homme qui va s'enfuir à cause de son père et de sa mère va se marier.	Akoz samem dimounn-la kit so papa, so mama, li marye.
Akoz samem si to vinn devan lotel pou ofer enn sakrifis e to rapel ki to pa bien ar to frer, les to ofrand lamem, rekonsilie ar to frer, apre to va prezant to ofrand Bondie.	This is why if you are about to place your gift on the altar and remember that you do not get along well with your brother leave your gift here, make peace with your brother, then come back and offer your gift to God.	C'est pourquoi si tu es sur le point de placer ton cadeau sur l'autel et te rappelles que tu ne t’entends pas bien avec ton frère laisse là ton offrande, fais la paix avec ton frère, puis viens présenter ton offrande à Dieu.	This is why, if you come to the hotel to offer a sacrifice, and remember that you are not good to your brother, let your offer be made up for yourself, and be reconciled to your brother, then you will make your offering to God.	Akoz samem kifer zot pre pou met zot kado dan later e zot pa rapel ki zot pa mars bien avek zot frer les zot kado isi, fer lape ar zot frer, lerla revinn e ofer zot kado Bondie.	C'est pourquoi, si vous êtes venu à la maison pour faire un sacrifice et vous ne savez pas que vous n'êtes pas bien à votre frère, abandonnez votre offer à votre propre frère, résiliez à votre frère, apre que vous abandonnez votre offer à Dieu.	Akoz samem zot pe rod plas zot kado dan lotel e akoz zot pa tande ar zot frer, les zot ale, fer lape ar zot frer, e apre sa vini pou prezant zotrande Bondie.
Li dir zot, mo ranpli ar enn gran tristes koumadir mo pe mor.	He said to them, I am so sad that I feel as if I am dying.	Il leur dit: Je suis si triste que je sens comme si je meurs.	He said to them, I am full of such sadness that I am dying.	Li ti dir zot, mo telman tris ki mo santi koumadir mo pe mor.	Il leur a dit, je suis plein d'une grande tristesse, comme je suis mort.	Li dir zot, mo telman tris ki mo santi koumadir mo pe bwar.
Enn gran lafoul ti pe swiv li e li ti pe geri zot tou.	Large crowds followed him, and he healed their sick people.	De grandes foules le suivirent, et il guérit les malades.	A large crowd was following him and healing them all.	Lafoul ti swiv li, e li geri zot bann malad.	Une grande foule s'approcha de lui et il guérit tous les malades.	Enn gran lafoul swiv li, e li geri bann maladi.
Lespri ti ris Zezi dan dezer kot diab ti tant li.	Jesus and the devil	Le Saint-Esprit conduisit Jésus dans le désert, de sorte que le diable puisse le tester.	The spirit caused Jesus to go into the desert, where the deer had tasted him.	Zezi ek maler.	L'esprit a amené Jésus dans le désert où le diable lui a frappé.	Lespri Sin pe konseye Zezi dan dezer pouki diab kapav piez li.
Enn zour enn dimoun ti gagn lide met anvant bann obze ki bar plas dan lakaz.	One day, someone got the idea to sell large household items.	Un jour, quelqu'un a eu l'idée de vendre de grands articles ménagers.	One day, someone got the idea of inventing objects to bark the house.	Enn zour kikenn ti gagn lide pou vann gran item lakaz.	Un jour, quelqu'un a eu l'idée de mettre en place des choses qui barchaient dans la maison.	Enn zour kikenn ti gagn lide vann gran lartik dan lakaz.
Parski li pa proteze par enn latmosfer kouma later, lalinn pa proteze kont sa bann evennman la – so sirfas ranpli avek krater temwagne.	Because it is not protected by an atmosphere as is the Earth, the Moon is not immune to such events - its reflected surface studded with craters.	Parce qu'elle n'est pas protégée par une atmosphère comme l'est la Terre, la Lune n'est pas à l'abri de ce genre d'événements - sa surface constellée de cratères en témoigne.	Because it is not protected by an earthy atmosphere, the lune is not protected against these events – its surface is full of witnesses.	Li pa proteze par enn lanatmosfer kouma later, Lalinn pa inpir a sa kalite evennman-la - so sirfas re-kare ar kret.	Because it n’est pas protected par l’atmosphère comme la terre, la lune n’est pas protected contre les Événements – son surface est pleine de témoins.	Parski li pa akoz enn latmosfer kouma later, Lalinn pa akoz sa kalite evennman-la - so sirfas konstle par kreer temwagne.
Bann bon menwizie ek sarpantie ti pe kapav debrouye san tro difikilte.	The joiners and carpenters fended for themselves without too much trouble.	Les menuisiers et charpentiers se débrouillèrent sans trop de peine.	The good men and the carpenters could all get ahead without much difficulty.	Bann zwenn ek sarpantie ti pe fennsi pou zotmem san tro boukou traka.	Les bons menuisiers et les charpentiers ont essayé de se débrouiller sans trop de difficulté.	Bann menizie ek sarpantie larg zot dousma.
E mo pa ase bon, pou mo kourbe devan li, pou larg so sandalet.	And I am not good enough even to stoop down and untie his sandals.	Et je ne suis pas assez bon même pour me baisser et délier ses sandales.	And I'm not good enough, I'll bend in front of him, and let him loose his sandals.	E mo pa ase bon mem alonz so sandale.	Et je n'ai pas assez de bon, pour le bouger devant lui, pour le débarrasser de sa sandale.	E mo pa ase bon mem pou mwa fer mwa devalie so sandale.
Li ferm labous bann demon parski zot ti kone ki Zezi ete.	But the demons knew who he was, and he did not let them speak.	Mais les démons savaient qui il était, et il ne les laissait pas parler.	He silenced the demons because they knew who Jesus was.	Me bann demon ti kone ki li ti ete, e li pa ti les zot koze.	Il a effrayé les démons parski ils savaient qu' Jésus était.	Me bann demon ti kone ki li ti ete, e li pa ti les zot koze.
Relasion ant Dr D.Y. Patil Medical College, reprezante par konpagni D.Y.P. Worldwide Ltd e UTM, ti ofisialize le 25 zwin 2009 par protokol lakor la.	The relationship between Dr. D.Y. Patil Medical College, represented by the company DYP Worldwide Ltd and UTM, was formalized in June 25, 2009 by the MoU.	La relation entre le Dr D.Y. Patil Medical College, repré­senté par la compagnie D.Y.P. Worldwide Ltd et l’UTM, a été officialisée le 25 juin 2009 par ce protocole d’accord.	The relationship between Dr.Y. Patil Medical College, represented by the D.Y.P. Worldwide and U kind, was officialized at the 25 o’clock through the protocol of the agreement.	Relasion ant Dr. D.Y. Patil Medical College, reprezante par konpayni DANTO Mondialwide AND U aldri, ti formelye an Zin 25, aldri par MoU.	Une réunion entre le Dr D.Y. Patil Medical College, représenté par lapagni D.Y.P. Worldwide, et l’U kind, était officialisée le 25 janvier 2006 par le protocole d’accord.	Relasion ant Dr D.Y. Patil Medical College, presente par REprezante par REprezante G.Y.P. Worldwide, e Gym, finn ofisyaliz sa protokol lakor la par sa protokol la.
Li dir li, profeser, ki pli gran komannman dan lalwa?	He asked him, teacher, what is the most important commandment in the Law?	Il lui a demandé, professeur, quel est le plus grand commandement de la loi?	He said, teacher, what are the most important commandments in the law?	Li ti dimann li, profeser, ki komannman pli inportan dan lalwa?	Il a demandé, professeur, quel est le premier commandement de la loi?	Li dir li, profeser, ki pli gran komannman lalwa ete?
Zot ti pe evolie natirelman dan enn lanvironnman pourtan pa fasil.	They were evolving naturally in a frankly difficult environment.	Ils évoluaient naturellement dans un environnement franchement difficile.	They were naturally educated in an unfaithful environment for a long time.	Zot ti devlop natirelman dan enn lanvironnman byen difisil.	Ils élevaient naturalement dans un milieu qui n’est pas facile encore.	Zot ti Evolie natirelman dan enn rezime trifisil.
Personn pa pran enn bout latwal ki pankor retresi pou rakomod enn vie linz.	No one patches old clothes by sewing on a piece of new cloth.	Personne ne raccomode de vieux vêtements en y cousant un morceau de tissu neuf.	No one takes a piece of tissue which is still rinked to make up an old clothes.	Personn pa met vie linz par sez lor enn morso nef palto.	Personne ne prend une coupe de latrine qui n’est pas encore comprimée pour reraciner une vieille robe.	Personn pa rekoud bann vie linz ena enn morso nef latwal.
Zot pou fer lepep krwar, li finn resisite parmi bann mor, e sa mansonz la pou pli pir ki premie la.	They will tell the people that he has been raised to life, and this last lie will be worse than the first one.	Ils vont dire aux gens qu'il a été ramené à la vie, et ce dernier mensonge sera pire que le premier.	People will believe that he did die, and that man will be worse than the first one.	Zot pou dir bann ki li finn res vivan e sa dernie manti pou pli pir ki premie.	Ils vont le croyez, il est ressuscité parmi les morts, et cette mangue sera encore plus pire que la première.	Zot pou dir bann dimounn ki finn fabrik li dan lavi, e sa dernie manson pou pli pir ki premie.
“Kimanyer mo pu al rode ki kote pwason ete?”, Zoko kalkile.	”How can I find out where all the fish have gone?”, Zoko thinks about it.	Comment puis-je savoir où tous les poissons ont disparu? , Zoko y pense.	“How will I go and look for the side of the fish?”, Zoko kalkiles.	“Kouma mo kapav dekuver kot tu pwason inn ale?”, Zoko panse.	Comment dois-je aller chercher le côté du poisson? , dit Zoko.	“Kouma mo kapav kone kot tu pwason inn disparet?”, Zoko panse.
Kan bann fidoner leve e koumans prepar zot lalanp, bann insousian la dimann bann seki bien saz la, er nou gagn inpe delwil ar zot.	When the girls got up and started getting their lamps ready, the foolish ones said to the others, let us have some of your oil.	Quand les filles se sont levés et ont commencé à recevoir leurs lampes prêt, les folles dirent aux autres, laissez-nous un peu de votre huile.	When the diviners got up and started preparing their lamps, the unwise ones asked the well-dressed ones, we’ll have some oil with them.	Ler bann tifi leve e koumans prepar zot lalanp, bann bet dir lezot, les nou pran inpe to petrol.	Quand les prêtres se lèvent et commencent à travailler leurs lampes, les innocents se demandant des gens qui sont sazzes, il y a un peu d'huile à eux.	Letan bann tifi leve e zot koumans gagn zot lalanp pare, bann mwano dir lezot, les nou inpe enn ti delwil.
Partu kote dan Moris, bann papa ek bann mama travay dir tut long lane.	All over Mauritius, fathers and mothers work hard during the year.	Partout à l'île Maurice, les pères et les mères travaillent dur pendant l'année.	Everywhere in Mauritius, fathers and mothers work very hard all the year round.	Tu Moris, papa ek mama travay dir pandan lane.	Partu dans l'île Maurice, les pères et les mères travaillent très dur toute la journée.	Partu dan Moris, papa ek mama travay dir pandan lane.
Sa pwason 9 pie la, ki finn maye dan dilo Koleford la mwa dernie.	The 9-foot fish, caught in waters off Kjollefjord last month.	Le poisson de 9 pieds, capturé dans les eaux au large de Kjollefjord le mois dernier.	The nine-foot fish caught in the Kolea water is my last.	Nifout pwason, ki ti may dan dilo ladan karant mwa.	Le poisson de l'arbre 9, qui a été saisi dans l'eau de la colle est mon dernier.	Nipie, captir dan dilo lao lao dan rele 93 minit dernie.
Ti ena enn troupo koson ki ti pe manze dan lezanviron.	Not far from there a large herd of pigs was feeding.	Non loin de là un grand troupeau de porcs se nourrissait.	There was a troupeau of pigs that was still a game in the outside world.	Pa lwen depi laba ti ena enn gran troupo koson ki ti pe nouri.	Il y avait un troupeau de cochon qui mangeait dans l'air.	Oparavan laba ti ena enn gro troupo koson ki ti pe nouri.
Depi sa zur la tipul vinn kamarad ek Bonom Lapay.	From that day onwards the little hen becomes the Scarecrow’s friend.	Dès ce jour-là la petite poule devient l'ami de l'épouvantail.	Ever since that day, the little mouse becomes friends with Old Man Lapay.	Apartir sa zour la, Tipul-la vinn kamarad Scarekol.	Cette fois-ci, la petite poule est devenue de notre ami et de notre Pâte.	Samem zour la ti poul vinn kamarad bann feyton.
Apre, diab ti amenn Zezi lavil sint e fer li dibout net lao lor tanp.	People need every word that God has spoken.	Ensuite, le diable a emmené Jésus dans la ville sainte et le fit tenir sur la partie la plus haute du temple.	Then the dust brought Jesus to the town and made him straight up on the temple.	Bann dimounn bizin tou seki Bondie finn dir.	Ensuite, le diable a amené Jésus à la ville et l'a fait se mettre tout droit sur le Temple.	Lerla diab-la amenn Zezi dan lavil sin e li dibout li lor pli ot kote tanp.
Me kan li al pre ar li, li pa trouv okenn fri, me zis bann fey.	But when he came to it, he found only leaves and no figs.	Mais quand il est venu à lui, il ne trouva que des feuilles et pas de figues.	But when he goes near him, he can’t find any fruits, but only leaves.	Me ler li ariv laba, li trouv zis fey e pa ti trouv fig.	Mais quand il s'approcha d'elle, il ne vit pas de fruits, mais des feuilles seulement.	Me ler li ariv kot li, li pa trouv fey e pa trouv fig.
Pilat dimann zot, ki mo pou fer ar Zezi ki zot apel Lekris?	Pilate asked them, what am I to do with Jesus, who is called the Messiah?	Pilate leur dit: que dois-je faire avec Jésus, qui est appelé le Messie?	Pilate asked them what I would do with Jesus, whom they called Jesus Christ?	Pilat dimann zot, ki mo pou fer ar Zezi Lemesi?	Pilate répondit: Que dois-je faire avec Jésus, qu'on appelle l'église?	Pilat dir zot, ki mo bizen fer avek Zezi, ki apel Lemesi?
Detrwa ki ti la tann sa e zot dir, li pe apel Eli.	Some of the people standing there heard Jesus and said, he's calling for Elijah.	Certaines des personnes qui se tenaient là entendirent Jésus et dirent: il appelle Élie.	Some of them heard this and said, his name is Elijah.	Ena dimounn ki ti dibout laba ti tann Zezi e dir li, li pe kriye Eli.	Certains ont entendu parler de ceci et ont dit, son nom est Élie.	Ena dimoun ki ti pe atann laba ti tann Zezi e dir li apel Eli.
Mo papa ki ti pe pran plis responsabilite amizir mo granper ti pe vieyi, ti fer tou pou aste teren Bay Goulam me nou vwazen ti refiz vande parski, li ti pe dir ouvertman, li ti santi li ek so fami ansekirite dan Kan Ramsamy.	My father, who took on more and more responsibilities as my grandfather got older, did everything in his power to buy Bhai Goolam’s land but our neighbour refused to sell because, and he would say this openly, he and his family felt safe in Camp Ramsamy.	Mon père, qui prenait de plus en plus de responsabilités comme mon grand-père vieillissait, faisait tout en son pouvoir pour acheter la terre de Bhai Goolam mais notre voisin refusait de vendre parce que, et il disait cela ouvertement, lui et sa famille se sentaient en sécurité dans le camp Ramsamy.	My dad, who was taking even more responsibility for making my grandfather grow old, did all to buy the land of Bhai Goulam but our neighbours refused to sell it because, he said openly, he felt him and his family were safe in Camp Ramsamy.	Mo papa ki ti pran plis ek plis responsabilite kan mo granper ti vinn vie ti fer tou so pouvwar pou aste later Bay Goolam me nou vwazin ti refiz vann parski li ti pou dir tou seki ouver, li ek so fami ti santi dan Kan Ramsamy.	Mon père qui faisait plus de responsabilité à cause de mon grand-père était vieilli, faisait tout pour acheter du site de Bay Goulam, mais notre voisin refusait de vander, parce qu'il a dit à l'ouest, qu'il était senti avec sa famille en sécurité dans Camp Ramsamy.	Mo papa ki ti pe pran anplis karem kouma mo granper ti vie ti fer tou pou aste later Bay Goolam me nou vwazin ti refiz vande parski li ti dir tou seki ouver, li ek so fami ti pe santi dan kan Ramsamy.
Mo anset ti vinn dan vilaz lepok ki tabisman ti bizen travayer dan plantasion.	My ancestors came to the village back when the estates needed workers for the plantation.	Mes ancêtres sont venus au village dans le passé quand les établissements avaient besoin de travailleurs pour la plantation.	My ancestors came into the village at a time when there was no need for workers to plant.	Mo bann anset ti revini dan vilaz kan tablisman ti bizen travayer pu plantasyon.	Mon ancêtre est venu dans le village quand les plantations avaient besoin de travailleurs.	Mo bann anset ti vinn dan vilaz dan lepase kan bann travayer ti bizen travay pou plantasion.
Mo finn fini prepare mo bann toro ek mo bann zanimo bien gra.	My cattle and prize calves have all been prepared.	Mes bovins et de veaux de valeur ont tous été préparés.	I have prepared my mice and my animals very fat.	Mo bebet ek mo bann kabri finn pare.	J'ai fini de travailler mes Touris et mes animaux très intelligents.	Tou mo bwar ek tou mo ver valer ti pare.
Enn gran lafoul antour li, li ti pe ansegn zot.	A large crowd gathered around him, and he taught them.	Une foule nombreuse se rassembla autour de lui, et il leur enseigna.	A large crowd crowd crowd surrounded him and taught them.	Enn gran lafoul ti rasanble otour li, e li ti ansegn zot.	Une grande foule l’entourait, il leur a dit.	Enn lafoul zennfi ti rasanble otur li, e li ti ansegnon zot.
Enn mwa plitar, Bondie avoy anz Gabriel dan lavil Nazaret dan Galile, avek enn mesaz pou enn vierz ki apel Mari.	One month later God sent the angel Gabriel to the town of Nazareth in Galilee with a message for a virgin named Mary.	Un mois plus tard, Dieu envoya l'ange Gabriel dans la ville de Nazareth, en Galilée, avec un message pour une vierge nommée Marie.	One month later, God sent Angel Gabriel to the town of Nazareth in Galilee with a message for a man named Mary.	Enn mwa pli tar Bondie ti avoy anz Gabriel dan lavil Nazaret dan Galile avek enn mesaz pou enn ki ti apel Mary.	Un jour plus tard, Dieu a envoyé unange Gabriel dans la ville de Nazareth en Galilée, avec une message à un homme appelé Marie.	Enn mwa pli tar, Bondie ti anvway anz Gabriel dan lavil Nazaret dan Galile, avek enn mesaz pou enn zenn nimero Marie.
Ala, mo dir zot, pou ras Rwayom Bondie ar zot e pou donn sa enn pep ki pou prodwir vre fri.	I tell you that God's kingdom will be taken from you and given to people who will do what he demands.	Je vous dis que le royaume de Dieu vous sera enlevé et donné à des gens qui vont faire ce qu'il demande.	This is my message to you, that you will take the kingdom of heaven from you and give it to the people who will produce real fruits.	Mo dir zot, Rwayom Bondie pou pran ar zot e pou donn bann ki pou fer seki li dimande.	Je vous dis que vous serez rassemblés du royaume des cieux et given à quiconque un produit de vrai fruits.	Mo dir zot, Rwayom Bondie pou lev zot e donn zot bann ki pou fer seki li dimande.
Li ti anvlop li dan lanz e plas li dan enn manzwar, parski pa ti ena plas pou zot dan lasal pou vwayazer.	She dressed him in baby clothes and laid him on a bed of hay, because there was no room for them in the inn.	Elle l’a habillé dans des vêtements de bébé et l’a couché sur un lit de foin, parce qu'il n'y avait pas de place pour eux à l'auberge.	He wrapped it in a basket and placed it in a manger, because there was no place for them in the room to travel.	Li ti abiye li dan enn ti linz e li ti poz li lor enn lili lerb parski pa ti ena lasam pou zot dan laboutik.	Il s'enveloppe dans une élagage et la place dans une manger, parce qu'il n'y avait pas de place pour les locataires dans la salle de voyager.	Li finn abiye li dan enn ti linz e li ti asiz lor lili lafwa parski pa ti ena plas pou zot dan loberz.
Lerla li ti beni zot e li ti dir Marie, sa garson la pou abes ouswa pou relev boukou dan Izrael.	Then he blessed them and told Mary, this child of yours will cause many people in Israel to fall and others to stand.	Puis il les bénit et dit à Marie, votre enfant va causer beaucoup de gens en Israël à tomber et les autres à se tenir debout.	Then he blessed them and said to Mary, the boy will be humiliated or will be raised a lot in Israel.	Lerla li beni zot e li dir Mari, to zanfan la pou fer boukou dimoun dan Izrael tom e lezot dimounn dibout.	Puis il leur a bénie et dit à Marie, cet garçon va s'habillé ou se rélever beaucoup d'Israël.	Lerla li beni zot e li dir Mari, to zanfan pou fer boukou dimoun dan Izrael tom e lezot pou dibout.
Zezi reponn li, kisannla mo mama e kisannla mo bann frer?	Jesus answered, who is my mother and who are my brothers?	Jésus répondit: Qui est ma mère et qui sont mes frères?	Jesus replied, who is my mother and who are my brothers?	Zezi dir li, kisannla mo mama e kisannla mo bann frer?	Jésus lui répondit: Qui est ma mère et qui est mes frères?	Zezi reponn, kisannla mo mama, kisannla mo frer?
Enn lizie pou enn lizie e enn ledan pou enn ledan.	An eye for an eye and a tooth for a tooth.	Oeil pour oeil, dent pour dent.	A eye for an eye and a bone for a bone.	Lizie pou enn lizie e enn dant pou enn dant.	Un oeil sera un yeux et un dedan sera un dedan.	Lizie, lizo, lizo.
Dan enn let le 13 desam 2011, TEC ti bein kritik kont UTM.	In a letter dated 13 December 2011, the TEC has been very critical of the UTM.	Dans une lettre en date du 13 décembre 2011, la TEC s’est montrée très critique envers l’UTM.	In a letter on 13th December 2011, THE Eighth Column was criticized.	Dan enn let dat 13 Desam 2011, LANGAZMAN-la finn bien kritik U.	Dans une lettre le 13 décembre 2011, Rien n’a été kritiké contre vous.	Dan enn let dat 13 Dimans 2011, LANGAZMAN la osi ti vinn kritik anver LANGAZMAN.
Li leve li al sers fimye, disab e li melanz dan later.	He then brings manure and sand and mixes both into the soil.	Il apporte alors du fumier et du sable et mélange les deux dans le sol.	She wakes up to the fim, sand, and mixes it into the ground.	Lerla li amenn inpir ek disab e li melanz toulede dan later.	Il se leva et se promène dans le champ pour regarder des films, le disab.	Alor li pran fimie ek dible e li melanz zot de dan later.
Uf! Sinn Sinn kwar li pu tom anba e li pu kas but but.	Oh! Sinn Sinn thinks he will fall down and break into pieces.	Oh! Sinn Sinn pense qu'il va tomber et se briser en morceaux.	You’re crazy! Sinn Sinn thinks he will fall down and break the bits.	Ah! Sinn Sinn panse li pu desann e kas an-de-trwa.	Automne! Sinn Sinn se croit qu’il va tomber et éclater les bouteilles.	Ah! Sinn Sinn panse li pou tonbe, al kase.
Li retourne e li trouv so bann disip pe dormi.	He came back and found his disciples sleeping.	Il revint et trouva ses disciples endormis.	He went back and found his disciples sleeping.	Li ti retourne e li trouv so bann disip pe dormi.	Il revint et vit que ses disciples dormaient.	Li revini e li trouv so bann disip pe dormi.
Lerla seki move pou zet zot dan sa gran dife-la, kot pou ena boukou plore ek kriye e grinsman ledan.	Then those evil people will be thrown into a flaming furnace, where they will cry and grit their teeth in pain.	Alors ces gens méchants seront jetés dans une fournaise enflammée, où ils vont pleurer et grincer les dents de douleur.	Then the evil one will throw them into the great fire, where there will be a lot of crying and shouting and tears.	Lerla sa bann move dimounn-la pou zet dan enn ranpli ar dife, kot zot pou plore ek grins zot ledan dan douler.	Ensuite, si vous êtes mal élevé, vous zettez dans le feu de toutes sortes, et il y aura beaucoup de pleurer et de crier et de grincer les dents.	Lerla bann move dimounn-la pou zet dan enn fourez anflame, kot zot pou plore ek grins zot ledan avek douler.
Sink tifi ladan ti insousian, e sink ti bien saz.	Five of the girls were foolish and five were wise.	Cinq des filles étaient folles, et cinq sages.	Five girls were conscious, and five were well- sazed.	Sink tifi la ti bet e senk ti bien saz.	Les cinq petites filles étaient intelligentes, et les cinq étaient très sazses.	sink tifi ti konekte, e sink saz.
Li groyne enn ku... or r r r r r r r apre li zape, wow, wow, wow.	He suddenly snarls... ar r r r r r, then he barks, woof, woof, woof.	Il gronde soudain ... ar r r r r r, alors il aboie, woof, woof, woof.	It rows a ku... or r r r r r r r r r r r rnd after it has been weighed, uh, oh, yeah, oh, yeah.	Enn sel kut... ar r r r r r r r r, lerla li tip e tap, waw, waw, waw.	Il y a un coup d'... ou de ro rocher de rocher de rocher de plus tard son générateur, générateur, générateur.	Li irle toutswit... ar rwarwa rwa rwa, lerla li abwaye, waw, waw, waw.
De bandi ti kouloute lor lakrwa ansam ar li, enn adrwat, lot la agos.	The soldiers also nailed two criminals on crosses, one to the right of Jesus and the other to his left.	Les soldats ont aussi cloué sur des croix deux malfaiteurs, l'un à la droite de Jésus et l'autre à sa gauche.	The two bandi jumped over the cross with him, one on the right, the other on the left.	Bann solda osi krisifie de bandi ki ti ena enn kote drwat Zezi e lot kote gos.	Les deux frères ont roulé sur la croix avec lui, une à l'autre, l'autre à l'autre.	Bann solda osi krisifie de malfeter, enn a drwat Zezi ek enn a gos.
To enn serviter ki pa vo nanye, mo pou fer pran twa e zet twa deor dan nwar, kot pou ena boukou plore, kriye ek grinsman ledan.	You are a worthless servant, and you will be thrown out into the dark where people will cry and grit their teeth in pain.	Vous êtes un serviteur inutile, et que vous serez jetés dehors dans les ténèbres où les gens vont pleurer et grincer les dents de douleur.	You servant who don't want anything, I will take you and throw you out into the night, where there will be a lot of crying, shouting and tearning of teeth.	Zot serviter inportan e zot pou zet dan marenwar kot dimounn pou plore ek grins zot ledan avek douler.	Un serviteur qui n'a pas envie de rien, je vais vous charger et vous zet dans la nuit où beaucoup vont pleurer, crier et vous grincer les dents.	Zot enn serviter vid e zot pou zet dan marenwar kot dimounn pou plore ek grins zot ledan douler.
Zezi pa reponn lor okenn pwin e so silans ti bien inpresionn gouverner.	But Jesus did not say anything, and the governor was greatly amazed.	Mais Jésus ne dit rien, et le gouverneur était grandement étonné.	Jesus did not answer at once, and his silence was very persuasive to the governor.	Zezi pa dir nanye e gouverner la ti extra etone.	Jésus n'a pas répondu sur un point et son silence était très persuasive le gouverneur.	Me Zezi pa dir nanye, e gouverner la ti etone.
